# Supplementary material
Source: PubMed Central journal article supplement (PMC3528594)
Supplement: 1206325109_pnas.201206325SI.pdf [file 1206325109_pnas.201206325SI.pdf]

# Supporting Information

Milanesi et al. 10.1073/pnas.1206325109

## SI Methods

**Fluorophore Labeling of Fibrils.** Fibrils of  $\beta_2m$  labeled with 5-(and 6)-carboxytetramethylrhodamine-succinimidyl ester (TMR) (Invitrogen-Molecular Probes) were prepared from labeled  $\beta_2m$  monomers mixed 1:9 with unlabeled wild-type monomers and seeded with 0.1% (wt/wt) fragmented fibrils. To label the monomers, a 10-fold molar excess of TMR over  $\beta_2m$  was used. TMR was dissolved in DMSO at a concentration of 1 mg/mL and added dropwise to a stirring  $\beta_2m$  solution (10 mg/mL in  $Na_2HCO_3$ ) in the dark for 1 h. A PD10 desalting column (Amersham Biosciences) was equilibrated using 25 mL of 100 mM Tris-HCl pH 8.0. Subsequently, 2.5 mL of the TMR- $\beta_2m$  conjugate was loaded onto the column and eluted using 3.5 mL of 100 mM Tris-HCl, pH 8.0. The TMR- $\beta_2m$  conjugate was dialyzed against water, lyophilized, and stored at  $-20^\circ C$ . Monomer was labeled with a ratio of  $\sim 1:2:2:1$  as determined by electrospray ionization mass spectrometry.

**Extrusion of LUVs.** A 20  $\mu L$  aliquot of the chloroform solution of 4:1 PC-PG was dried under a stream of nitrogen for at least 30 min and then under vacuum for at least 1 h, and then re-suspended by vortexing for 5 min in 50 mM Hepes, 107 mM NaCl, 1 mM EDTA, pH 7.4 (liposome buffer) to final concentrations of 1.3, 2.6, or 3.9 mM lipids. This suspension was then sonicated for 20 s in an ultrasound bath to remove excess air and foam and then extruded (Avanti Lipids Mini-Extruder) through polycarbonate filters with 100 nm pore size 25 or 30 times.

Liposomes were stored at room temperature and used within 24 h of preparation.

**Rapid Evaporation to Produce Giant Vesicles.** A total of 500  $\mu L$  of aqueous phase containing the liposome buffer supplemented with 0.1 M sucrose was added to 200  $\mu L$  of the fluorescently labeled lipid solution in chloroform to a round-bottom flask, followed by brief vigorous mixing of the two phases by pipetting. The organic solvent was immediately removed in a rotary evaporator under reduced pressure (final pressure 40 mbar) for 2–3 min at room temperature. The resulting vesicle suspension exhibited a slightly turbid appearance and was used on the day of preparation. The final lipid concentration was 2 mM. Similar results were obtained with 4:1 mixtures and 1:1 mixtures of PC-PG (compare Fig. 2 with Figs. S3A and S4A).

**Time Course of Fluorescence Measurements.** To acquire confocal images, giant vesicles must be deposited from solution onto a glass slide, which takes 5–15 min. When monitoring interaction of GVs with a small, soluble protein or protein oligomers, the protein can be applied without disturbing the layer of vesicles, diffusion enabling the mixing of the sample (1). By contrast amyloid fibrils have a low diffusion rate so that the samples must be mixed with the vesicles before deposition onto the glass slide. Thus, images cannot be obtained until at least 5 min after initiating the reaction. From this time point, time-lapse imaging failed to reveal any additional morphological changes of the vesicles or fibrils, as their interaction is faster than the experimental setup.

1. Beales PA, Bergstrom CL, Geerts N, Groves JT, Vanderlick TK (2011) Single vesicle observations of the cardiolipin-cytochrome C interaction: Induction of membrane morphology changes. *Langmuir* 27(10):6107–6115.

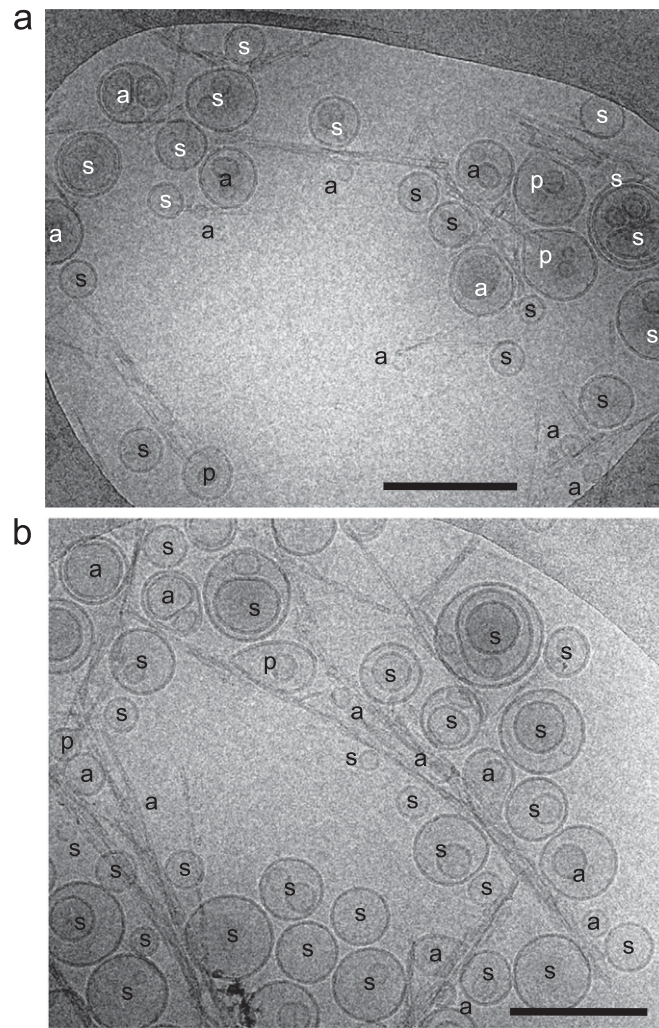

**Fig. S1.** Example areas showing classification of liposomes into pointed (P), smoothly rounded (S), or ambiguous (A). The ambiguous category is for liposomes that are obscured by contacts with fibril bundles and/or other liposomes, precluding their reliable identification as either pointed or smooth. (A) Liposomes incubated with short  $\beta_2m$  fibrils; (B) liposomes incubated with long  $\beta_2m$  fibrils. (Scale bar: 200 nm.)

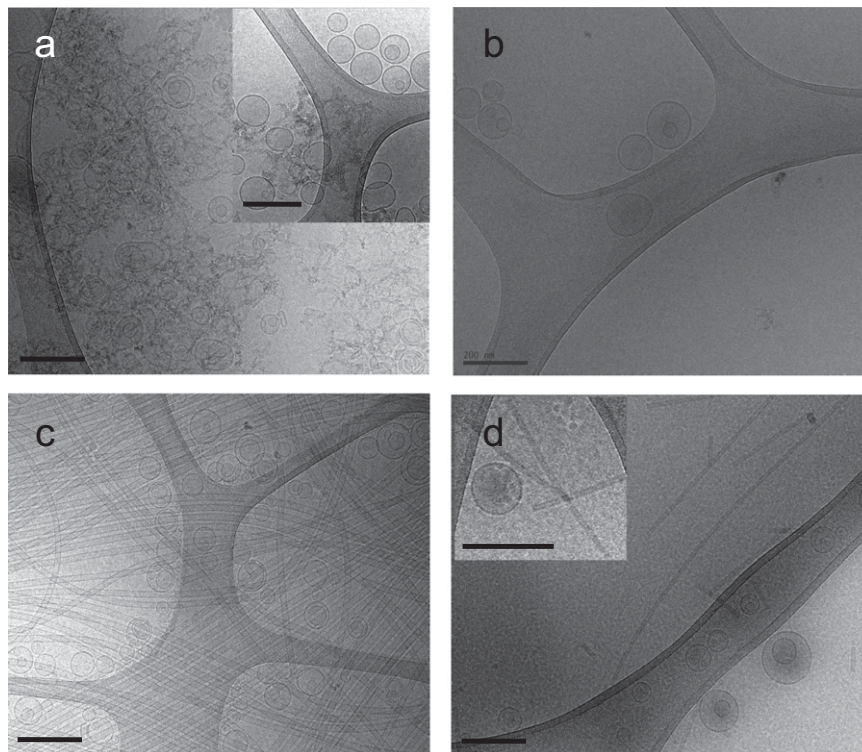

**Fig. S2.** Cryo-EM images of control samples with PC-PG liposomes, showing lack of distortion and weak or absent interactions. (A) WL  $\beta_2m$  fibrils with PC-PG liposomes. This sample also contained areas of free liposomes on other parts of the grid, one of which is shown in the inset. (B) Liposomes in the presence of  $\beta_2m$  monomers ( $19 \mu M$  monomer, equivalent to the subunit concentration in the fibril samples). (C) Microtubules with liposomes. (D) TMV filaments with liposomes. The inset shows a liposome near the end of a TMV filament. (Scale bar: 200 nm.) Note that liposomes alone are blotted off during grid preparation, but more are retained if they are bound by fibrils.





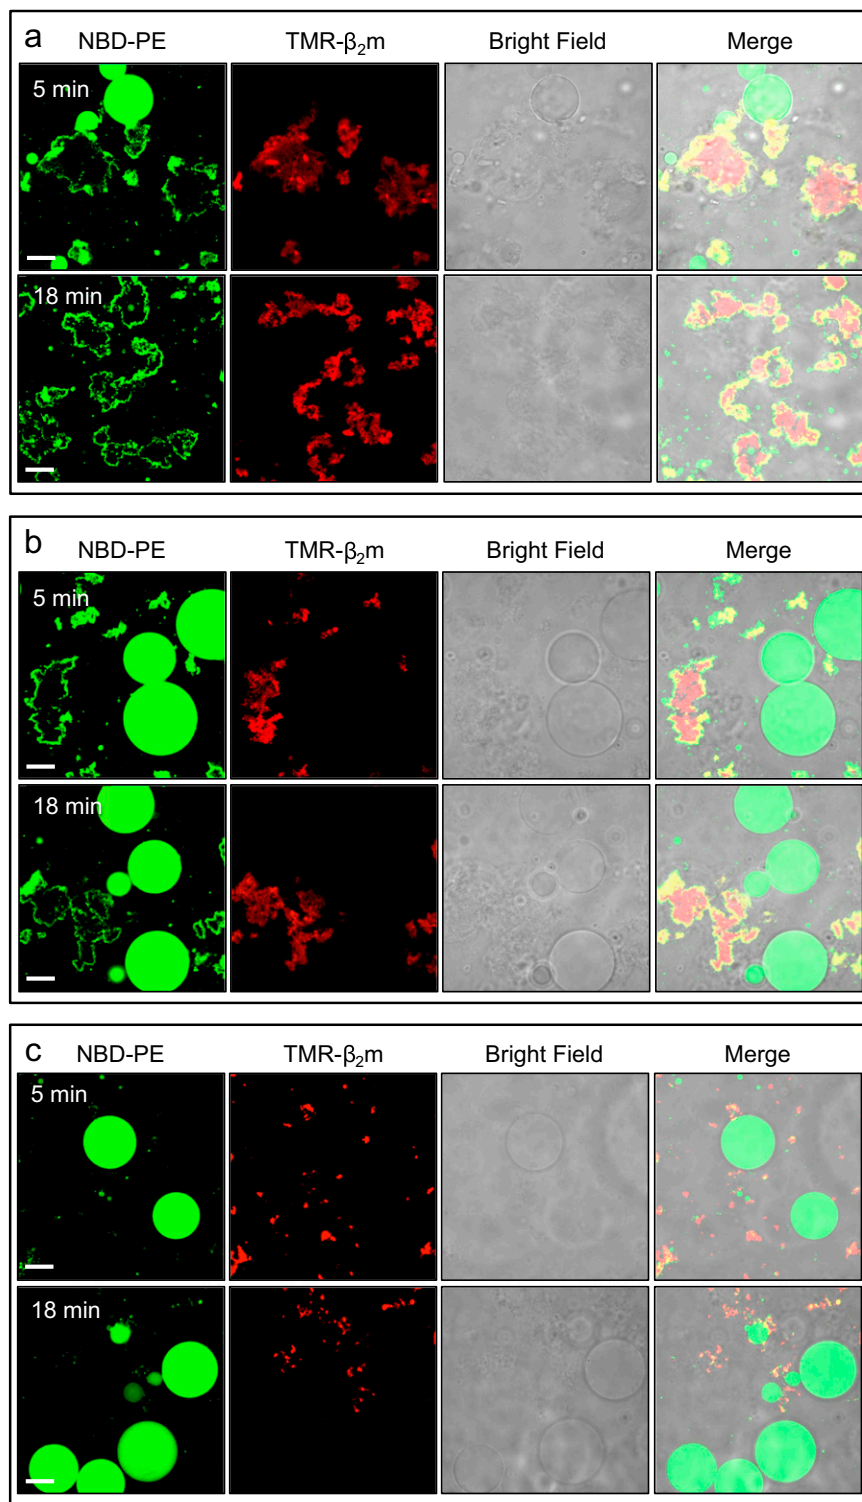

**Fig. S4.** Fluorescence microscopy showing different types of  $\beta_2m$  fibrils incubated with giant vesicles. (A) Liposomes incubated with short  $\beta_2m$  fibrils, (B) liposomes with incubated long  $\beta_2m$  fibrils, and (C) liposomes incubated with WL  $\beta_2m$  fibrils. The images were obtained after incubation times of 5 or 18 min. Green, NBD-PE labeled giant vesicles; red, TMR- $\beta_2m$  fibrils. (Scale bar: 20  $\mu m$ .) Colocalization of lipids and fibrils is indicated by yellow.



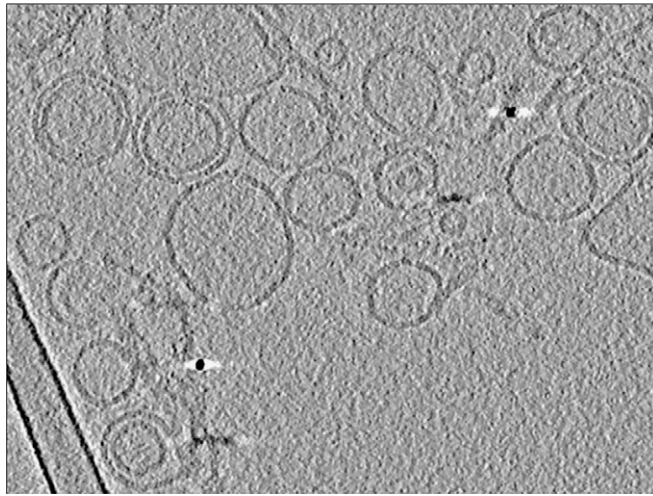

**Movie S2.** Cryotomogram of liposomes and amyloid fibrils as above, taken closer to focus. This volume contains several examples of liposomes distorted into points at the sites of contact with fibrils. This tomogram was collected at a nominal underfocus value of  $3\ \mu\text{m}$  to resolve the lipid bilayer at the expense of contrast and was denoised as above (1, 2).

[Movie S2](#)

1. Kremer JR, Mastrorarde DN, McIntosh JR (1996) Computer visualization of three-dimensional image data using IMOD. *J Struct Biol* 116(1):71–76.
2. Frangakis AS, Hegerl R (2001) Noise reduction in electron tomographic reconstructions using nonlinear anisotropic diffusion. *J Struct Biol* 135(3):239–250.
